# Supplementary material for: (Poly)phenol intake, plant-rich dietary patterns and cardiometabolic health: a cross-sectional study
Source: Royal Society of Chemistry journal article supplement (doi:10.1039/d3fo00019b), 2023-01-01
Supplement: d3fo00019b2.xlsx [file d3fo00019b2.xlsx]

## Sheet: Table S1
Table S1 Calculation and food components of Dietary Aproaches to Stop Hypertension (DASH)
Components		Scoring
Vegetables	Broccoli, cabbage, lettuce, mushrooms, carrots, avocado, etc.	Q1 = 1 point , Q2 = 2 points, Q3 = 3 points, Q4 = 4 points, Q5 = 5 points
Fruit	Apples, bananas, melon, grapefruit, berries, citrus, apricots, fruit cocktail, apple juice, orange juice, etc.
Nuts and legumes	Hazelnuts, peanuts, peanut butter, tofu, soybeans, beans or lentils and peas
Whole grains	Cereal, oatmeal, dark bread, etc.
Low-fat dairy	Skimmed/semi-skimmed milk, low-fat yogurt, cottage cheese	Q5 = 1 point, Q4 = 2 points, Q3 = 3 points, Q2 = 4 points, Q1 = 5 points
Sweetened beverages	Soft drink
Red and processed meats	Bacon, liver, sausages, beef, pork, lamb, etc.
Sodium	Sum of sodium in FFQ

## Sheet: Table S2
Table S2 Calculation and food components of Mediterranean-DASH Intervention for Neurodegenerative Delay (MIND)
Components			Scoring
			0	0.5	1
Brain healthy foods	Green Leafy Vegetables	Cabbage, lettuce, spinach, coleslaw, watercress, etc.	≤2 servings/wk	>2 to <6/wk	≥6 servings/wk
	Other Vegetables	Potatoes, peppers, carrots, broccoli, peas, avocado, etc.	<5 serving/wk	5 to <7 wk	≥1 serving/d
	Berries	Strawberries, raspberries	<1 serving/wk	1/wk	≥2 servings/wk
	Nuts	Hazelnuts, peanuts, peanut butter	<1/mo	1/mo to <5/wk	≥5 servings/wk
	Olive Oil	Olive oil used for cooking and dressing	Not primary oil		Primary oil used
	Whole Grains	Cereal, oatmeal, dark bread, etc.	<1 serving/d	1–2/d	≥3 servings/d
	Fish	Fish and seafood without being fried	Rarely	1–3/mo	≥1 meals/wk
	Beans	Beans, lentils, tofu, soybeans, etc.	<1 meal/wk	1–3/wk	>3 meals/wk
	Poultry	Chicken, turkey	<1 meal/wk	1/wk	≥2 meals/wk
Brain unhealthy foods	Butter, Margarine	Butter, margarine, lard	>2 T/d	1–2/d	<1 T/d
	Cheese	Cheese and cheese sauce	7 + servings/wk	1–6/wk	< 1 serving/wk
	Red Meat and products	Bacon, liver, sausages, beef, pork, lamb, etc.	7 + meals/wk	4–6/wk	< 4 meals/wk
	Fast Fried Foods	Fried chips and cod, fish fingers	4 + times/wk	1–3/wk	< 1 time/wk
	Pastries & Sweets	Digestive biscuits, cake, fruit pies, ice cream, chocolate bars, croissants, cream crackers, scones, etc.	7 + servings/wk	5–6/wk	< 5 servings/wk
	Wine	Rose wine, vermouth	>1 glass/d or never	1/mo–6/wk	1 glass/d

## Sheet: Table S3
Table S3 Calculation and food components of Original Mediterranean Score (O-MED)
Components			Scoring
			0	1
Beneficial components	Fruits and nuts	Apples, bananas, melon, grapefruit, berries, citrus, apricots, fruit cocktail, apple juice, orange juice, hazelnuts, peanuts, peanut butter, etc.	< median	> median
	Vegetables	Potatoes, broccoli, cabbage, lettuce, mushrooms, carrots, avocado, potatoes, etc.	< median	> median
	Legumes	Tofu, soybeans, beans or lentils and peas	< median	> median
	Cereal	Refined and whole grains	< median	> median
	Fish	Tuna, salmon, fish, prawns, mussel, crab, etc	< median	> median
Detrimental components	Meat	Poultry, bacon, liver, sausages, beef, pork, lamb, etc.	> median	< median
	Dairy products	Milk, cream, ice cream, full-fat yogurt, cheese, butter	> median	< median
	Ethanol	Wine, beer, cider, etc	Women, <5 to >25g; Men <10 to >50g	Women, 5 to 25 g; Men 10 to 50 g
	Fat intake	Ratio of monounsaturated fatty acids to saturated fatty acids	< median	> median

## Sheet: Table S4
Table S4 Calculation and food components of Amended Mediterranean Score (A-MED)
Components			Scoring
			0	1
Beneficial components	Fruit	Apples, bananas, melon, grapefruit, berries, citrus, apricots, fruit cocktail, apple juice, orange juice, etc.	< median	> median
	Vegetables	Broccoli, cabbage, lettuce, mushrooms, carrots, avocado, potatoes, etc.	< median	> median
	Legumes	Tofu, soybeans, beans or lentils and peas	< median	>median
	Nuts	Hazelnuts, peanuts, seeds.	< median	> median
	Whole grains	Whole grains	< median	> median
	Fish	Tuna, salmon, fish, prawns, mussel, crab, etc	< median	> median
Detrimental components	Meat	Bacon, liver, sausages, beef, pork, lamb, etc.	> median	< median
	Ethanol	Wine, beer, cider, etc	<5 to >25g	5 to 25 g
	Fat intake	Ratio of monounsaturated fatty acids to saturated fatty acids	< median	> median

## Sheet: Table S5
Table S5 Calculation and food components of Plant-based Diet Index (PDI)
Components			Scoring
			PDI	hPDI	uPDI
Healthy	Whole grains	Cereal, oatmeal, dark bread, etc.	Q1 = 1 point , Q2 = 2 points, Q3 = 3 points, Q4 = 4 points, Q5 = 5 points	Q1 = 1 point , Q2 = 2 points, Q3 = 3 points, Q4 = 4 points, Q5 = 5 points	Q5 = 1 point, Q4 = 2 points, Q3 = 3 points, Q2 = 4 points, Q1 = 5 points
	Fruits	Apples, bananas, melon, grapefruit, berries, citrus, apricots, fruit cocktail, etc.
	Vegetables	Broccoli, cabbage, lettuce, mushrooms, carrots, avocado, etc.
	Nuts	Hazelnuts, peanuts, peanut butter
	Legumes	Tofu, soybeans, beans or lentils and peas
	Vegetable oils	All vegetable oils used for cooking
	Tea & Coffee	Tea and coffee
Less Healthy	Fruit juices	Apple juice and orange juice	Q1 = 1 point , Q2 = 2 points, Q3 = 3 points, Q4 = 4 points, Q5 = 5 points	Q5 = 1 point, Q4 = 2 points, Q3 = 3 points, Q2 = 4 points, Q1 = 5 points	Q1 = 1 point , Q2 = 2 points, Q3 = 3 points, Q4 = 4 points, Q5 = 5 points
	Refined grains	White bread, white rice, white spaghetti, digestive biscuits, etc.
	Potatoes	Potato chips, baked, salad or mashed potatoes, potato crisps
	Sugar sweetened beverages	Soft drinks and concentrated fruit drinks
	Sweets and Desserts	Chocolates, sweets, pudding, doughnuts, cake, pie, etc.
Animal food groups	Animal fat	Butter and lard used for cooking	Q5 = 1 point, Q4 = 2 points, Q3 = 3 points, Q2 = 4 points, Q1 = 5 points	Q5 = 1 point, Q4 = 2 points, Q3 = 3 points, Q2 = 4 points, Q1 = 5 points	Q5 = 1 point, Q4 = 2 points, Q3 = 3 points, Q2 = 4 points, Q1 = 5 points
	Dairy	Milk, cream, ice cream, yogurt, cheese
	Egg	Eggs
	Fish or Seafood	Tuna, salmon, fish, prawns, mussel, crab, etc
	Meat	Poultry, bacon, liver, sausages, beef, pork, lamb, etc.
	Misc. animal-based foods	Cream soup, creamy salad dressing, oxtail soup, quiche

## Sheet: Table S6
Table S6 (Poly)phenol-rich food items in the study population measured using Food Frequency Questionnaire
(Poly)phenol-rich food items (g/d)	Mean	SD
Tea	261.3	290.9
Coffee	182.7	208.2
Red wine	26.5	48
Whole grains	85.5	78.7
Chocolate and cocoa products	3.1	5.1
Berries	6.4	8.7
Apple and apple juice	65.7	76.7
Pear	18.7	33.7
Grape	11.8	18.1
Plum	1.8	3.9
Citrus fruit and juice	63.7	78.7
Onion	18.8	17.5
Pepper	7.2	8.8
Garlic	2.6	2.6
Green vegatable	39.2	38.2
Pulses	48.5	48.6
Soy and soy products	37.9	102.5
Nuts	13.2	19.1
Olive oil	0.2	0.4

## Sheet: Table S7
Table S7 Micro and Macronutrient intake in the study population measured using Food Frequency Questionnaire
Micro and Macronutrient	Mean	SD
Fibre (g/d)	16.1	7
Calcium (mg/d)	804	308.7
Chloride (mg/d)	3334.3	1259
Copper (mg/d)	1.2	0.5
Iron (mg/d)	10.3	3.5
Iodine (μg/d)	130.4	57.1
Potassium (mg/d)	3161.2	985.6
Selenium (μg/d)	59.2	25.1
Nitrogen (g/d)	12.3	4.2
Zinc (mg/d)	8.6	2.9
Magnesium (mg/d)	299.4	99.1
Manganese (mg/d)	3.3	1.4
Sodium (mg/d)	2229.8	851.1
Niacin (mg/d)	20.6	7.4
Phosphorus (mg/d)	1272.8	389.6
Vitamin A_retinol (μg/d)	415.7	424.3
Vitamin A_retinol equivalents (μg/d)	1055.3	593.8
Alpha carotene (μg/d)	437.5	388
Beta carotene (μg/d)	3428.5	2208.5
Total carotene (μg/d)	3809.6	2401.1
Vitamin B1 (mg/d)	1.4	0.5
Vitamin B2 (mg/d)	1.7	0.6
Vitamin B6 (mg/d)	2	0.7
Vitamin B12 (μg/d)	6	3.9
Vitamin C (mg/d)	106.4	57.2
Vitamin D (μg/d)	3	2.5
Vitamin E (mg/d)	10.7	4.5
Total folate (μg/d)	270.2	102.5
Fat (g/d)	64.9	25
Cholesterol (mg/d)	267.7	150.7
MUFA (g/d)	24.9	10.5
PUFA (g/d)	11.9	5.3
SFA (g/d)	22.4	9.9
Protein (g/d)	75.5	25.9
Total carbohydrate (g/d)	184.2	61.4
Sugars (g/d)	87.8	36.4
Fructose (g/d)	18.8	10.1
Galactose (g/d)	0.6	0.7
Glucose (g/d)	16.9	8.6
Starch (g/d)	93.3	37.2
Sucrose (g/d)	34.5	17.4
Lactose (g/d)	13.2	9.4
Maltose (g/d)	1.9	1.4
